# Supplementary material
Source: PubMed Central journal article supplement (PMC2757970)
Supplement: supp_M109.030593_jbc.M109.030593-1.pdf [file supp_M109.030593_jbc.M109.030593-1.pdf]

## SUPPLEMENTAL MATERIAL

*NMR analysis of purified mannosyl lipids 1 and 2* - The complete chemical structures of native PIM<sub>2</sub> and PIM<sub>6</sub> in their deacylated and acylated forms have been reported (main text references 19, 20, 21). It was clearly established that in the case of PIM<sub>2</sub>, the mannosyl units were attached to positions 2 and 6 of the *myo*-Ins (*myo*-Inositol) ring of PI. Taking advantage of this information, a combination of 1D and 2D-NMR was then used to determine the position at which the Man<sub>p</sub> residues were attached to *myo*-Ins in mannosyl lipids 1 and 2 (Fig. 2 and Fig. 3S, 4S, 5S and 6S).

While the <sup>1</sup>H and <sup>13</sup>C peaks of the glycerol moiety and lipid chains of mannosyl lipids 1 and 2 appeared at identical chemical shifts in both mannosyl lipids as well as in PI, the <sup>1</sup>H and <sup>13</sup>C chemical shifts of the *myo*-Ins moiety were different in mannosyl lipids 1 and 2 reflecting different attachment sites of the Man<sub>p</sub> residue. In the <sup>1</sup>H NMR spectra of mannosyl lipid 1, the chemical shifts of the H-1, H-3, H-4, H-5 and H-6 protons of *myo*-Ins moiety were similar to that of PI. However, the chemical shift of the H-2 proton showed a higher value (4.296 ppm) when compared to the corresponding peak in PI (4.173 ppm) (Fig. 3S). In addition, the COSY spectra of mannosyl lipid 1 revealed that both the H-1 and H-3 protons of *myo*-Ins showed correlation to the peak at 4.296 ppm. Therefore, this peak was undoubtedly assigned to the H-2 proton of the *myo*-Ins moiety.

It has been demonstrated previously that the  $\alpha$ -anomer protons usually resonate downfield compared to the  $\beta$ -anomers (31). The vicinal coupling constant between the anomeric H-1 and the H-2 indicates the relative orientation of the two protons in the sugar ring. In particular, the coupling constant (J) of  $\alpha$ -anomer protons has been reported to be < 2Hz (31). Based on its chemical shift value and J coupling (1.60 Hz), the anomeric proton of Man<sub>p</sub> (5.14 ppm) in mannosyl lipid 1 has been assigned to the  $\alpha$ -anomer. This assignment is in accordance with the reported native chemical structure of PIM<sub>2</sub> and its acylated forms (19, 20, 21). Using the  $\alpha$ -anomeric proton as a starting point, the complete <sup>1</sup>H chemical shifts of the Man<sub>p</sub> ring in mannosyl lipid 1 have been deduced using a

combination of COSY and TOCSY NMR. (Fig. 4S). Then, the corresponding  $^{13}\text{C}$  chemical shifts were deduced by using the  $^1\text{H}$ - $^{13}\text{C}$  HSQC spectra (Fig. 5S). In the 2D TOCSY spectrum of mannosyl lipid 1, the  $\alpha$ -anomeric proton of Manp at 5.14 ppm showed long range correlation to H-2 of *myo*-Ins at 4.296 ppm (Fig. 4S). Similarly, in the  $^1\text{H}$ - $^{13}\text{C}$  HMBC spectrum of mannosyl lipid 1, the  $\alpha$ -anomeric proton of Manp at 5.14 ppm showed long range correlation to the  $^{13}\text{C}$  peak C-2 of *myo*-Ins at 79.14 ppm (Fig. 5S). It is also noteworthy that, in mannosyl lipid 1, the  $^1\text{H}$  and  $^{13}\text{C}$  peaks corresponding to position-2 of *myo*-Ins were downfield shifted by 0.12 and 7.02 ppm, respectively, as compared to that of PI. Altogether, the experimental data clearly demonstrated that mannosyl lipid 1 corresponds to  $\alpha$ -2-linked PIM<sub>1</sub>.

In the  $^1\text{H}$  NMR spectrum of mannosyl lipid 2, the chemical shift of the H-1, H-2, H-3, H-4 and H-5 protons of *myo*-Ins moiety were similar to that of PI. However the chemical shift of H-6 showed a higher value (3.94 ppm) when compared to the corresponding H-6 proton in PI (3.793 ppm) (Fig. 6S). The entire  $^1\text{H}$  chemical shift of mannosyl lipid 2 was deduced in a similar manner as explained above using the combination of COSY and TOCSY NMR. Due to limiting quantities of mannosyl lipid 2, 2D heteronuclear experiments were not performed in this case. In the  $^1\text{H}$  spectra of mannosyl lipid 2, the  $\alpha$ -anomeric proton appeared at 5.072 ppm ( $J = 1.6\text{Hz}$ ), which showed long-range correlation (TOCSY) to the H-6 proton of *myo*-Ins at 3.94 ppm. From these combined results, mannosyl lipid 2 was assigned to  $\alpha$ -6-linked PIM<sub>1</sub>.

*NMR analysis of purified mannosyl lipids 5* – In the  $^1\text{H}$  spectra of mannosyl lipid 5, the chemical shift of H-2, H-3, H-4 and H-5 were similar to that of Manp residues linked to positions 2 and 6 of *myo*-Ins (Fig. 8SA and 8SB). However, two sets of H-6 (AB multiplets) proton signals were observed as evidenced by the correlation of H-5 to H-6 in the COSY spectrum. One set of H-6 protons appeared at 3.74 and 3.83 ppm and another set appeared at 4.05 and 4.10 ppm. Further, 2D  $^1\text{H}$ - $^{13}\text{C}$  HMBC showed long-range correlation from H-6 protons at 4.05 and 4.10 ppm to a carboxylic  $^{13}\text{C}$  peak corresponding to an esterified acyl chain, which confirmed the acylation of the Manp residue at position 6 (Fig 8SC).

## REFERENCES

31. Duus, J., Gotfredsen, C. H., Bock, K. (2000) *Chem Rev.* **100**, 4589-614.

## SUPPLEMENTAL FIGURES

**Fig. 1S. Purification of a recombinant form of *MsPimB*'.** 2  $\mu$ g of purified recombinants forms *MsPimA* and *MsPimB* were run on a SDS-PAGE and stained with SimplyBlue<sup>TM</sup> SafeStain (Invitrogen).

**Fig. 2S. MALDI-TOF/MS analysis of the purified mannolipids 1, 2, 3, 4 and 5.**

**Fig. 3S. NMR analysis of purified mannolipids 1 and 2.** A-B. <sup>1</sup>H NMR spectrum of mannolipid 1 with complete assignment of peaks.

**Fig. 4S. NMR analysis of purified mannolipids 1 and 2.** A. <sup>1</sup>H-<sup>1</sup>H TOCSY spectrum of mannolipid 1 showing the complete assignment of peaks. B. Selected region of the <sup>1</sup>H-<sup>1</sup>H TOCSY spectrum showing diagnostic correlation from the  $\alpha$ -anomeric proton of *Manp* (5.14 ppm) to the H-2 proton of *myo*-Ins (4.296 ppm).

**Fig. 5S. NMR analysis of purified mannolipids 1 and 2.** A. <sup>1</sup>H-<sup>13</sup>C HSQC spectrum of mannolipid 1 with assignments of cross peaks. B. Selected region of the <sup>1</sup>H-<sup>13</sup>C HMBC spectrum of mannolipid 1 showing the diagnostic correlation for the  $\alpha$ -anomeric proton of *Manp* (5.14 ppm) to the C-2 of *myo*-Ins (79.14 ppm).

**Fig. 6S. NMR analysis of purified mannolipids 1 and 2.** Selected regions of the  $^1\text{H}$  NMR spectrum of mannolipid 1 (A), mannolipid 2 (B) and PI (C). Compared to PI, one can clearly observe the downfield shift of the H-2 and H-6 protons of *myo*-Ins upon Man $p$  linkage in mannolipid 1 and 2, respectively.

**Fig. 7S. Inactivation of MsPimA and MsPimB' at 60°C.** TLC autoradiograph of enzymatic reactions performed with purified recombinant MsPimA and MsPimB' pre-incubated at 37°C and 60°C.

**Fig. 8S. NMR analysis of purified mannolipid 5.** A-B.  $^1\text{H}$  NMR spectrum of mannolipid 5 with complete assignment of peaks. C. Selected region of the  $^1\text{H}$ - $^{13}\text{C}$  HMBC spectrum of mannolipid 5 showing diagnostic correlation for the H-6 proton of Man $p$  (4.055 and 4.095 ppm) to the carboxylic carbon of the acyl group (174.4 ppm). This data clearly indicates that the acyl group is linked to position 6 of Man $p$ .

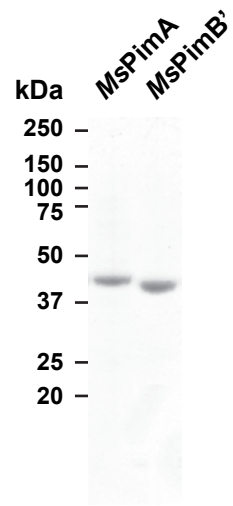

**Figure 1S**

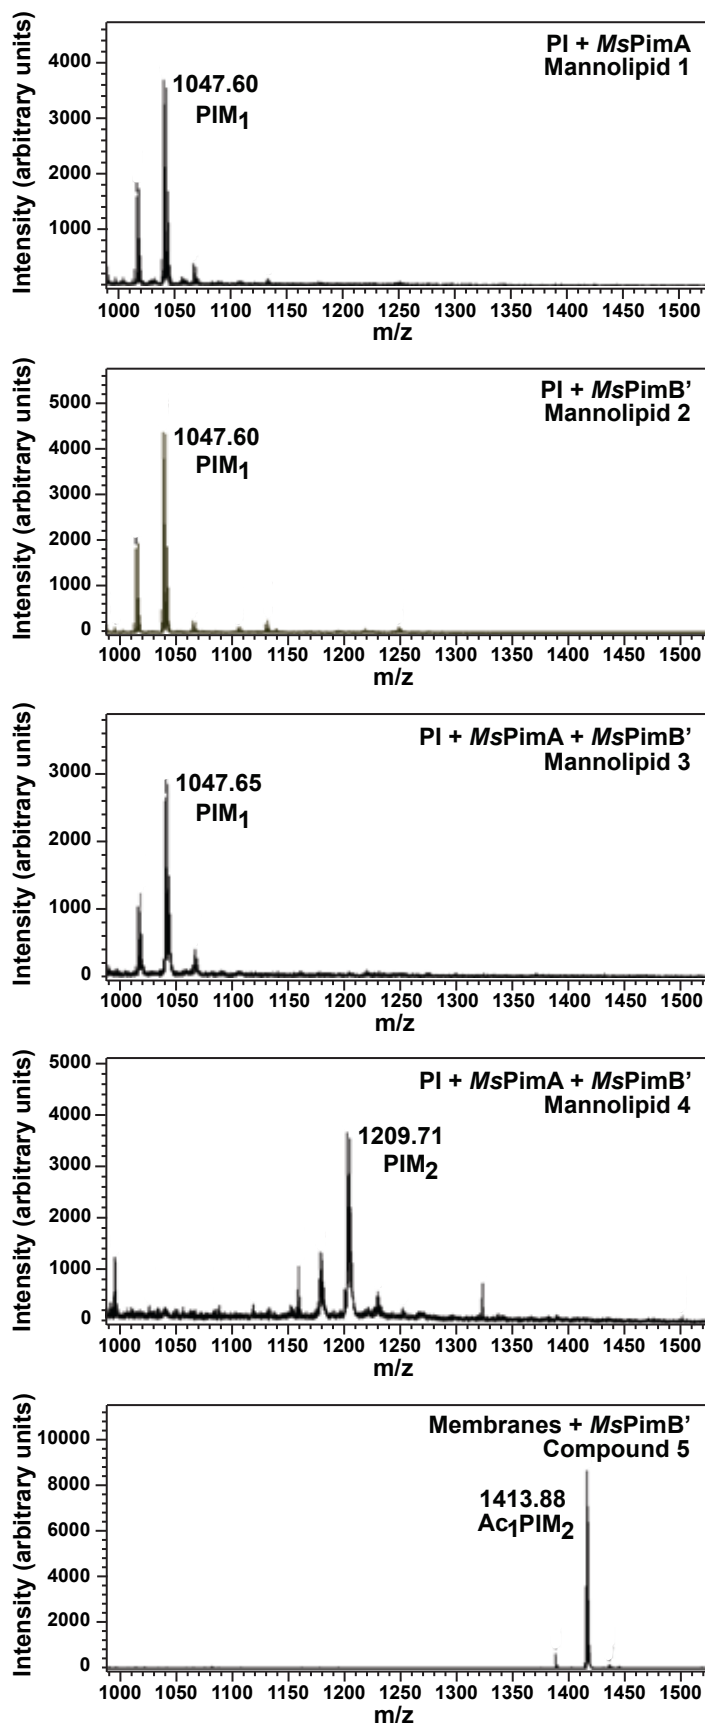

**Figure 2S**

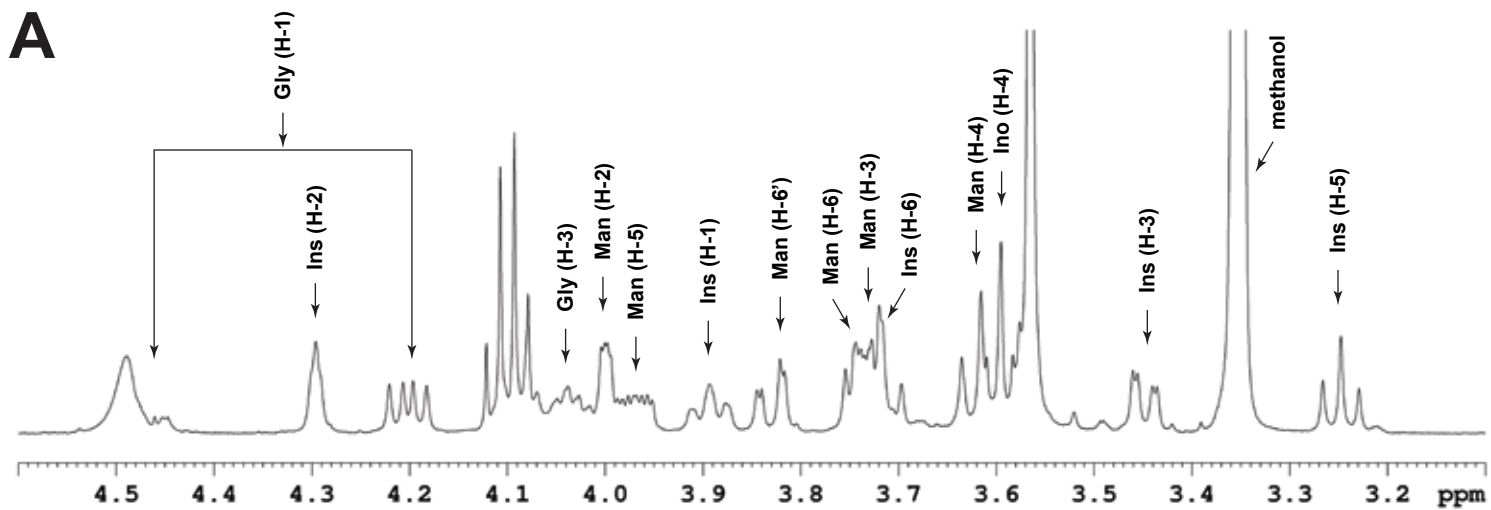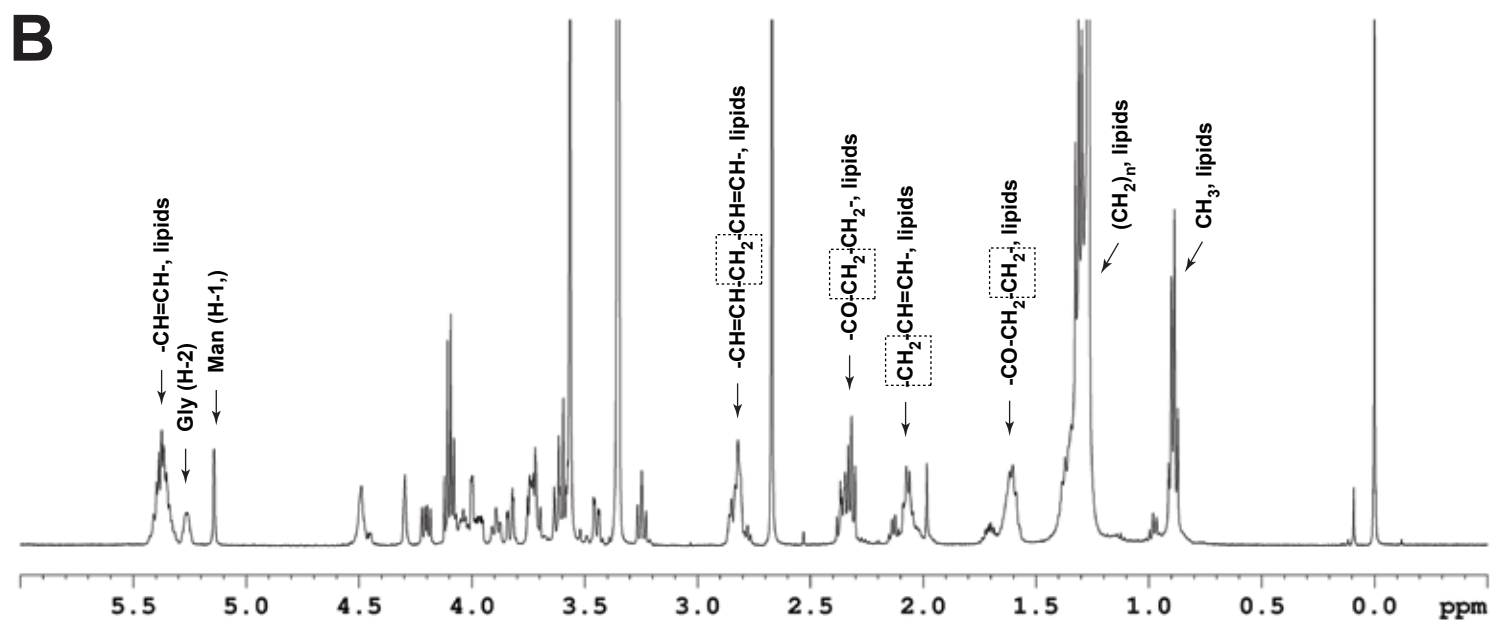

**Figure 3S**

**A**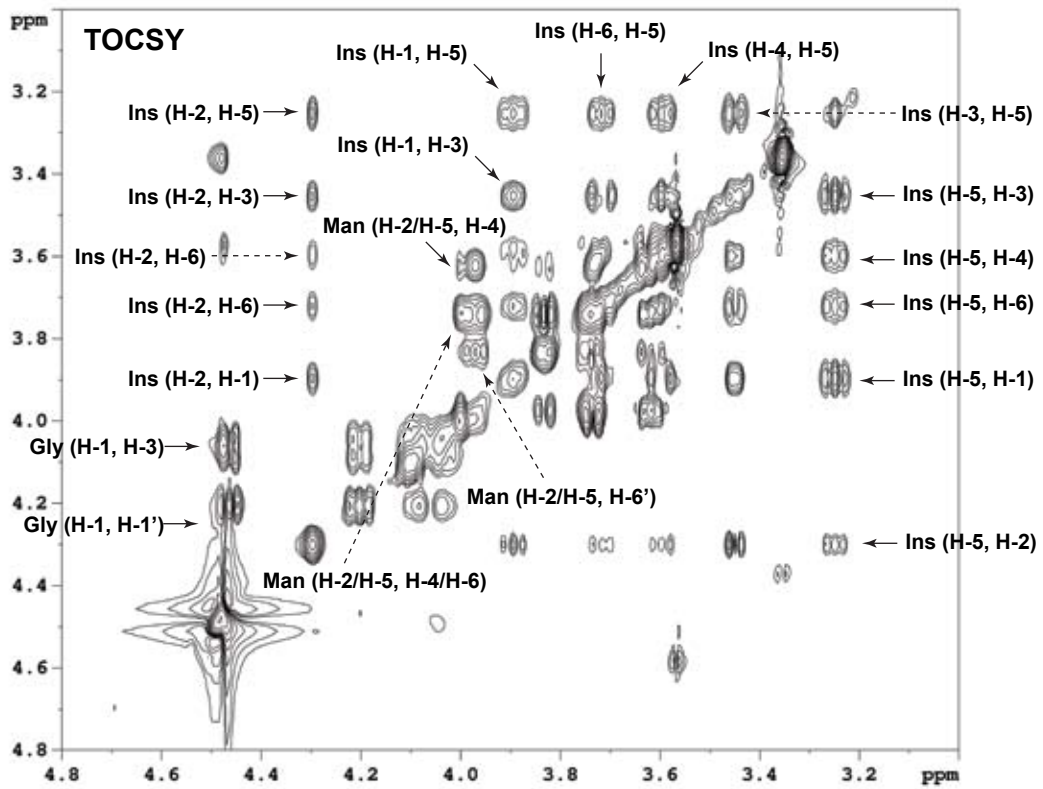**B**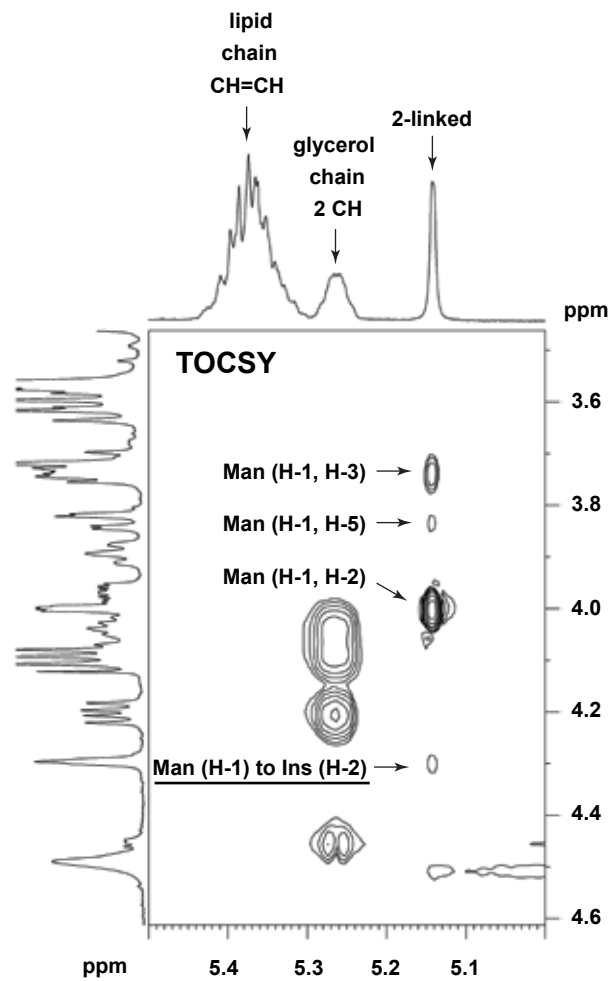**Figure 4S**



**A**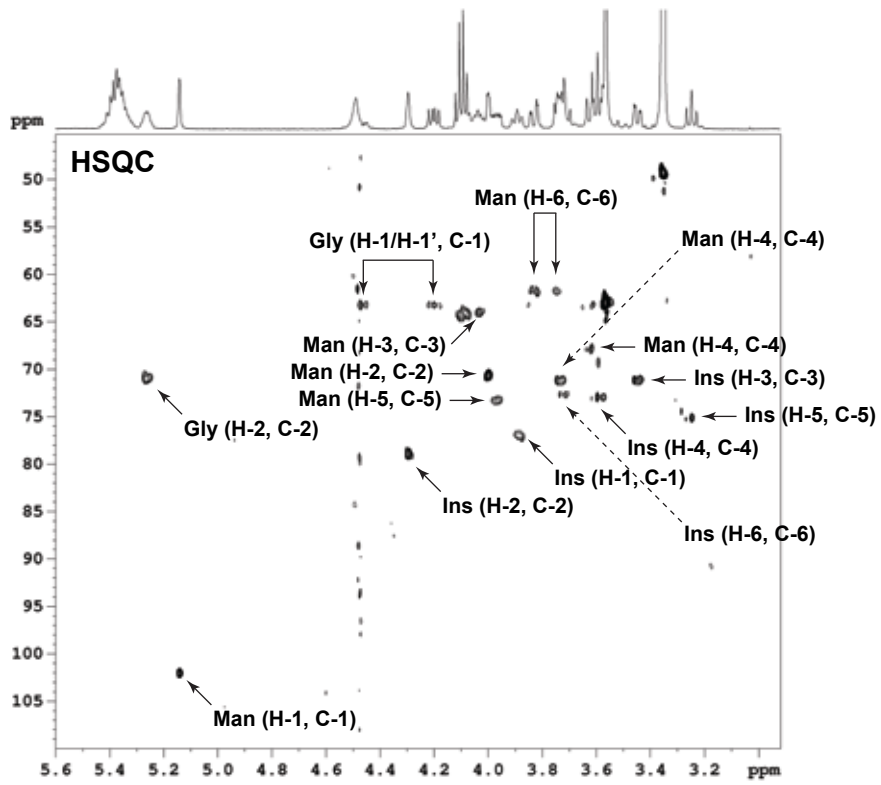**B**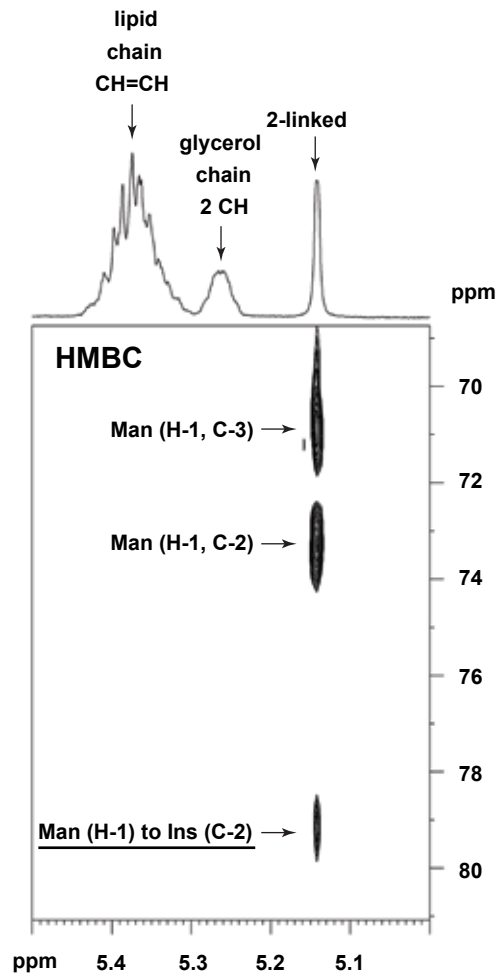**Figure 5S**

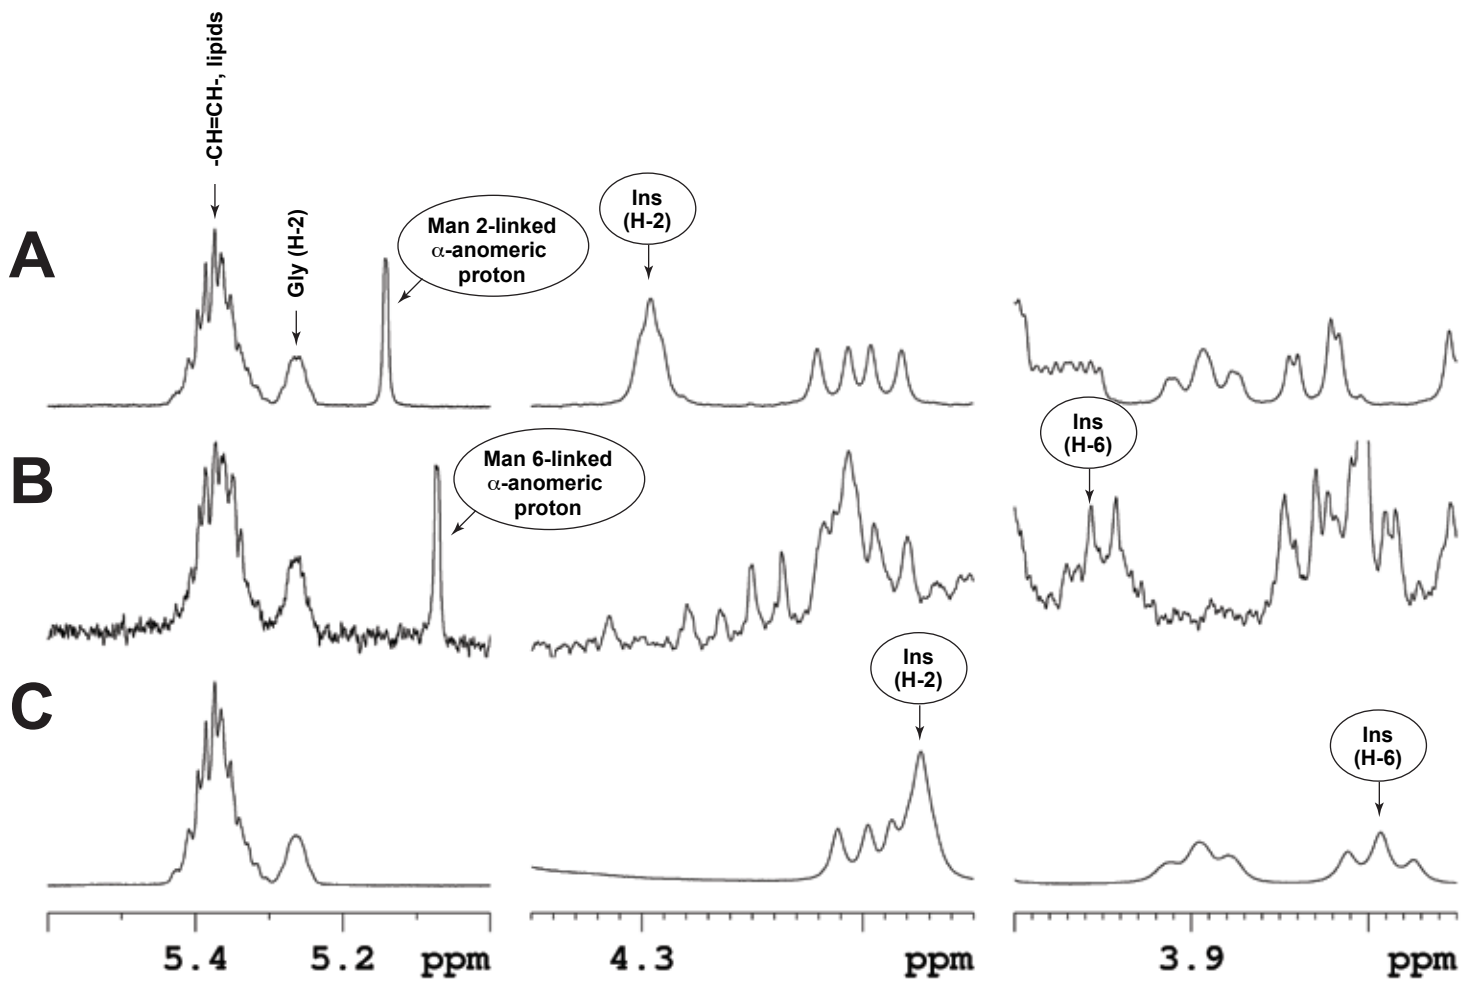

Figure 6S

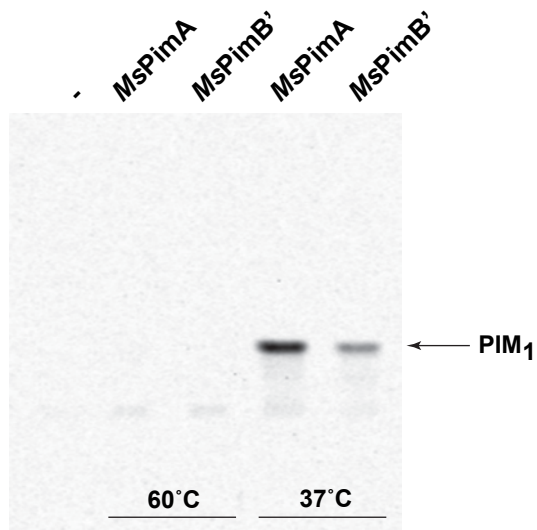

**Figure 7S**

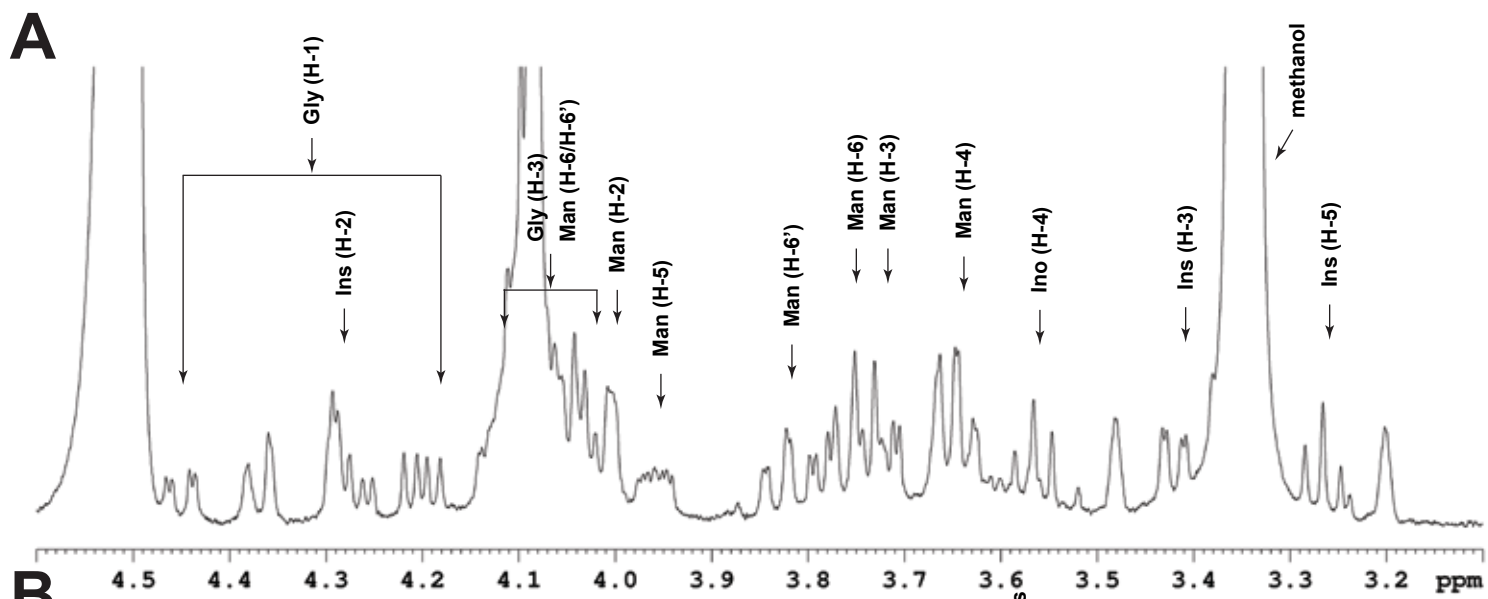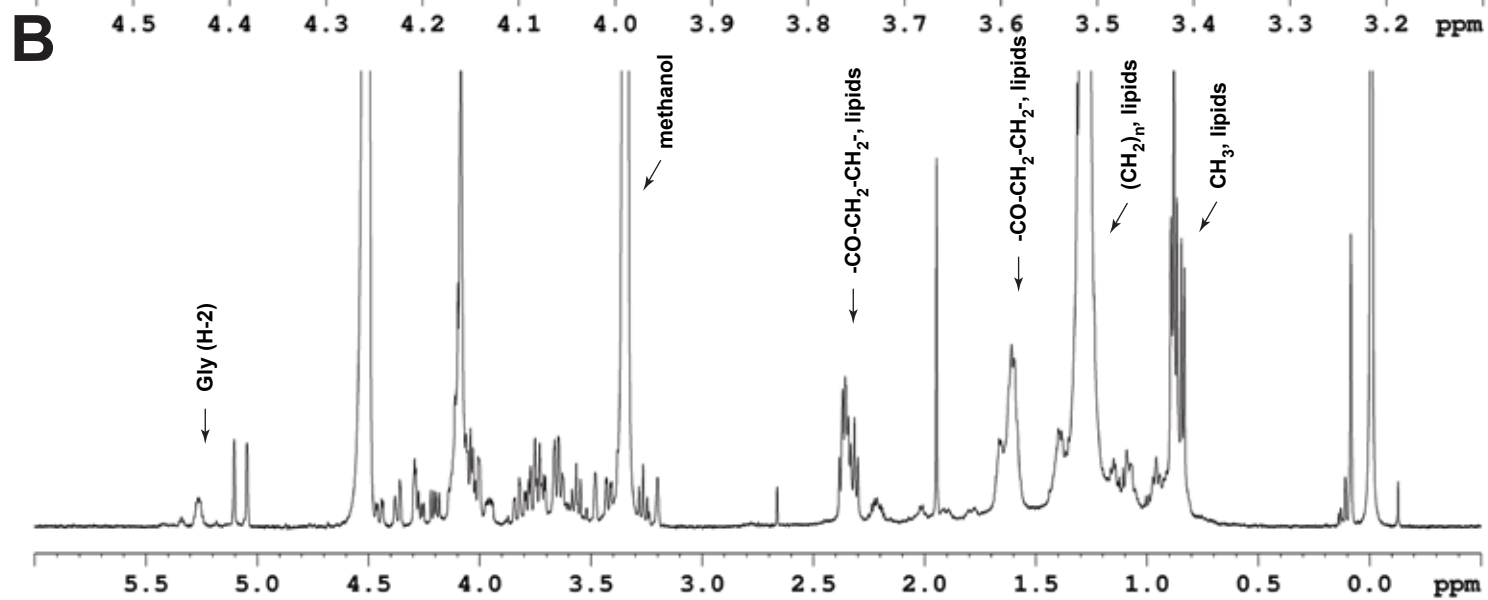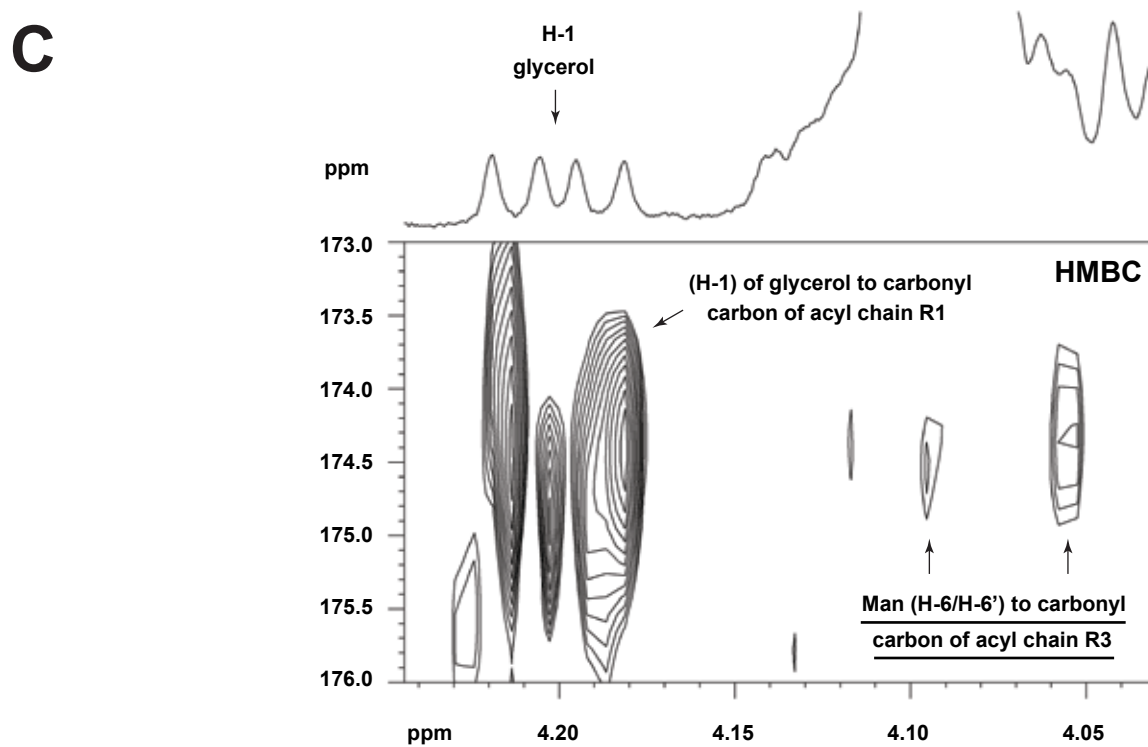

**Figure 8S**
